# Supplementary material
Source: publisher site journal article supplement (https://www.dovepress.com/get_supplementary_file.php?f=333501.docx)
Supplement: Supplementary file 1 [file get_supplementary_file.php]

| Academic | Hospital employed | Multi-specialty group | Private or Solo practice |
| --- | --- | --- | --- |

1. **My current employment is**:

| Still in training | 1-3 years | 3 – 5 years | 5 -10 years | >10 years |
| --- | --- | --- | --- | --- |

1. **I have been in practice for:**

| True | False |
| --- | --- |

1. **I have been involved in clinical guideline development?**
2. **During my training, I feel/felt that I am/was adequately trained accessing and applying guidelines in my daily practice**

| Strongly Agree | Agree | Neutral | Disagree | Strongly Disagree |
| --- | --- | --- | --- | --- |

1. **I would rate my adherence to clinical practice guidelines as**:

| Very high | High | Average | Low | Very low |
| --- | --- | --- | --- | --- |

1. **With regards to guidelines within my specialty, I feel that**:

| - 1. I have sufficient input on the content of guidelines | | Strongly Agree | Agree | Neutral | Disagree | Strongly Disagree | | --- | --- | --- | --- | --- | |
| --- | --- | --- | --- | --- | --- | --- |
| - 1. I understand the process of guidelines development | | Strongly Agree | Agree | Neutral | Disagree | Strongly Disagree | | --- | --- | --- | --- | --- | |
| - 1. I have easy access to guidelines within my practice | | Strongly Agree | Agree | Neutral | Disagree | Strongly Disagree | | --- | --- | --- | --- | --- | |
| - 1. Current guidelines are evidence-based | | Strongly Agree | Agree | Neutral | Disagree | Strongly Disagree | | --- | --- | --- | --- | --- | |
| - 1. Guideline documents are easy to read and understand | | Strongly Agree | Agree | Neutral | Disagree | Strongly Disagree | | --- | --- | --- | --- | --- | |
| - 1. My knowledge of clinical practice guidelines is up-to-date | | Strongly Agree | Agree | Neutral | Disagree | Strongly Disagree | | --- | --- | --- | --- | --- | |
| - 1. Guidelines may already be out of date by the time of publication | | Strongly Agree | Agree | Neutral | Disagree | Strongly Disagree | | --- | --- | --- | --- | --- | |
| h. Other: | |

1. **In my opinion, the following factors are barriers to using clinical practice guidelines**?

| - 1. Lack of access/ difficulty in access to guidelines | | Strongly Agree | Agree | Neutral | Disagree | Strongly Disagree | | --- | --- | --- | --- | --- | |
| --- | --- | --- | --- | --- | --- | --- |
| - 1. Length or complexity of guidelines documents | | Strongly Agree | Agree | Neutral | Disagree | Strongly Disagree | | --- | --- | --- | --- | --- | |
| - 1. Time constraints due to clinical responsibilities | | Strongly Agree | Agree | Neutral | Disagree | Strongly Disagree | | --- | --- | --- | --- | --- | |
| - 1. Lack of physician involvement in guideline development | | Strongly Agree | Agree | Neutral | Disagree | Strongly Disagree | | --- | --- | --- | --- | --- | |
| - 1. Conflicting guidelines on the same topic | | Strongly Agree | Agree | Neutral | Disagree | Strongly Disagree | | --- | --- | --- | --- | --- | |
| - 1. High number of conditional or weak recommendations | | Strongly Agree | Agree | Neutral | Disagree | Strongly Disagree | | --- | --- | --- | --- | --- | |
| - 1. Concerns that guidelines do not apply to a single patient | | Strongly Agree | Agree | Neutral | Disagree | Strongly Disagree | | --- | --- | --- | --- | --- | |
| - 1. Patient refusal to comply with guidelines | | Strongly Agree | Agree | Neutral | Disagree | Strongly Disagree | | --- | --- | --- | --- | --- | |
| - 1. Physician apathy to abide by guidelines | | Strongly Agree | Agree | Neutral | Disagree | Strongly Disagree | | --- | --- | --- | --- | --- | |
| - 1. Lack of insurance coverage to certain guidelines | | Strongly Agree | Agree | Neutral | Disagree | Strongly Disagree | | --- | --- | --- | --- | --- | |
| - 1. Lack of consideration of cost of some recommendations | | Strongly Agree | Agree | Neutral | Disagree | Strongly Disagree | | --- | --- | --- | --- | --- | |

1. **In my opinion, the following factors can help increase awareness of and adherence to clinical practice guidelines**?

| a. Improved focus on guidelines during training | | Strongly Agree | Agree | Neutral | Disagree | Strongly Disagree | | --- | --- | --- | --- | --- | |
| --- | --- | --- | --- | --- | --- | --- |
| b. Access to relevant guidelines at the point of care (EMR) | | Strongly Agree | Agree | Neutral | Disagree | Strongly Disagree | | --- | --- | --- | --- | --- | |
| c. Linking payment incentives to guideline adherence | | Strongly Agree | Agree | Neutral | Disagree | Strongly Disagree | | --- | --- | --- | --- | --- | |
| d. Having more input on topic and content on guidelines | | Strongly Agree | Agree | Neutral | Disagree | Strongly Disagree | | --- | --- | --- | --- | --- | |
| e. More transparency on physician commercial affliction | | Strongly Agree | Agree | Neutral | Disagree | Strongly Disagree | | --- | --- | --- | --- | --- | |
